# Supplementary material for: Retinal input integration in excitatory and inhibitory neurons in the mouse superior colliculus in vivo
Source: eLife. 2023 Sep 8;12:RP88289. doi: 10.7554/eLife.88289 (PMC10491433; doi:10.7554/eLife.88289)
Supplement: Figure 4—source data 1. [file elife-88289-fig4-data1.xlsx]

## Sheet: fig4
	efficacy_1st	efficacy_2nd	EXC	INH	psr_deadTime30_MinMAxISI_2_30	psr_deadTime30_MinMAxISI_5_30
0	0.943231	0.77355	TRUE	FALSE	0.904286	0.820106
1	8.04316	9.23422	TRUE	FALSE	1.08106	1.14808
2	1.94136	2.84467	TRUE	FALSE	1.60017	1.4653
3	4.9564	5.49282	TRUE	FALSE	1.02742	1.10823
4	14.7274	16.6633	TRUE	FALSE	1.1328	1.13145
5	2.25547	2.90953	TRUE	FALSE	0.867913	1.28999
6	0.631828	0.709435	TRUE	FALSE	1.68787	1.12283
7	5.66535	5.47399	TRUE	FALSE	0.919767	0.966224
8	3.2527	3.39571	TRUE	FALSE	0.790464	1.04396
9	1.28137	1.70568	TRUE	FALSE	1.63411	1.33114
10	5.40031	7.21612	TRUE	FALSE	0.980568	1.33624
11	1.16673	1.4778	TRUE	FALSE	1.53831	1.26661
12	0.289342	0.471551	TRUE	FALSE	1.66615	1.62974
13	0.306396	0.397007	TRUE	FALSE	2.28313	1.29573
14	4.08917	5.28953	TRUE	FALSE	1.49487	1.29355
15	0.393866	0.673984	TRUE	FALSE	1.89535	1.7112
16	0.790998	0.821238	TRUE	FALSE	1.12385	1.03823
17	0.825112	1.15624	TRUE	FALSE	1.46304	1.40131
18	1.76645	2.94094	TRUE	FALSE	1.71101	1.66488
19	0.464928	0.368969	TRUE	FALSE	1.47586	0.793605
20	0.386539	0.756859	TRUE	FALSE	1.50752	1.95804
21	1.65571	0.918293	TRUE	FALSE	0.849438	0.554622
22	0.294623	0.826582	TRUE	FALSE	3.49205	2.80556
23	0.772217	1.05866	TRUE	FALSE	1.6216	1.37093
24	1.64284	3.05815	TRUE	FALSE	1.95402	1.8615
25	1.83175	1.91898	TRUE	FALSE	1.3367	1.04762
26	0.956551	1.40746	TRUE	FALSE	1.95677	1.47139
27	3.86082	4.73648	FALSE	FALSE	0.972614	1.2268
28	1.09315	0.990261	FALSE	FALSE	1.32131	0.905882
29	0.924598	0.843187	FALSE	FALSE	1.2025	0.91195
30	1.32275	2.50476	FALSE	FALSE	2.23043	1.8936
31	4.22369	3.38438	TRUE	FALSE	1.32973	0.801285
32	19.0735	17.1634	TRUE	FALSE	0.795162	0.899856
33	2.59023	2.47093	TRUE	FALSE	1.17121	0.953942
34	3.36461	4.07507	TRUE	FALSE	0.966994	1.21116
35	3.42766	2.99066	TRUE	FALSE	0.929036	0.872508
36	12.5538	14.3631	TRUE	FALSE	0.935535	1.14413
37	4.9085	7.51896	TRUE	FALSE	0.765106	1.53182
38	5.46151	7.65224	TRUE	FALSE	0.556969	1.40112
39	0.341823	0.352355	TRUE	FALSE	2.28753	1.03081
40	0.418209	0.259879	FALSE	TRUE	1.55634	0.62141
41	0.532363	1.28686	TRUE	FALSE	0.896021	2.41727
42	1.69244	3.69522	TRUE	FALSE	1.25387	2.18337
43	0.015287	0.191088	TRUE	FALSE	7.59664	12.5
44	0.240783	0.276815	TRUE	FALSE	1.68144	1.14964
45	2.08722	4.72831	TRUE	FALSE	2.68317	2.26536
46	0.771255	2.11887	TRUE	FALSE	2.83333	2.7473
47	0.292344	0.429771	TRUE	FALSE	2.2322	1.47009
48	48.6926	34.8057	TRUE	FALSE	0.679384	0.714804
49	4.99926	6.80256	TRUE	FALSE	1.30058	1.36071
50	2.34834	3.48221	TRUE	FALSE	0.668085	1.48284
51	5.70299	6.08256	TRUE	FALSE	0.797165	1.06656
52	9.71219	8.97436	TRUE	FALSE	0.811034	0.92403
53	6.63761	10.2418	TRUE	FALSE	1.4575	1.543
54	9.90398	11.6999	TRUE	FALSE	1.25056	1.18133
55	3.32802	2.11951	TRUE	FALSE	0.756159	0.636869
56	1.97976	2.68906	TRUE	FALSE	1.31691	1.35828
57	3.53655	4.09059	TRUE	FALSE	1.0371	1.15666
58	2.17158	2.19456	TRUE	FALSE	0.681818	1.01058
59	1.23707	0.80429	TRUE	FALSE	0.987865	0.650155
60	0.194909	0.443323	TRUE	FALSE	2.73016	2.27451
61	10.5724	13.515	FALSE	TRUE	1.20328	1.27833
62	5.78496	6.33014	FALSE	TRUE	1.01468	1.09424
63	3.42251	3.79101	TRUE	FALSE	0.992853	1.10767
64	4.80896	5.93983	FALSE	TRUE	0.878927	1.23516
65	6.49672	8.36699	FALSE	TRUE	1.18085	1.28788
66	1.90387	2.64312	FALSE	TRUE	1.1691	1.38829
67	1.56818	2.63585	TRUE	FALSE	1.07647	1.68083
68	1.11302	1.19009	TRUE	FALSE	1.24919	1.06924
69	2.40297	2.20484	TRUE	FALSE	0.630137	0.917548
70	7.19133	8.96675	FALSE	FALSE	1.49287	1.24688
71	2.56046	2.66714	FALSE	FALSE	1.04036	1.04167
72	5.77234	8.33417	TRUE	FALSE	1.37129	1.44381
73	0.98738	0.929464	FALSE	TRUE	1.02875	0.941343
74	0.860294	1.32051	FALSE	TRUE	1.44859	1.53495
75	1.01819	1.58239	FALSE	TRUE	1.69055	1.55412
76	4.90922	7.00431	FALSE	TRUE	1.66746	1.42677
77	1.2909	1.75114	FALSE	TRUE	1.71854	1.35653
78	10.0502	6.81196	FALSE	TRUE	0.735472	0.677793
79	1.58124	2.51643	TRUE	FALSE	2.27287	1.59143
80	1.25603	1.82636	FALSE	FALSE	1.75803	1.45407
81	0.688043	1.54868	TRUE	FALSE	2.61032	2.25086
82	1.02217	1.60547	TRUE	FALSE	1.54272	1.57065
83	0.277578	0.587594	TRUE	FALSE	1.74797	2.11686
84	1.7145	2.30439	TRUE	FALSE	1.15719	1.34406
85	0.0989859	0.605744	TRUE	FALSE	14.6753	6.1195
86	0.592417	0.661331	TRUE	FALSE	1.5325	1.11633
87	3.45839	6.88769	FALSE	TRUE	1.17159	1.99159
88	1.97648	2.91794	TRUE	FALSE	1.61654	1.47634
89	11.2451	23.0013	TRUE	FALSE	1.47875	2.04545
90	5.76344	14.427	TRUE	FALSE	1.70041	2.5032
91	1.35197	2.11451	TRUE	FALSE	1.85331	1.56402
92	7.98165	15.7995	TRUE	FALSE	1.74087	1.97947
93	1.52996	4.42354	TRUE	FALSE	3.24615	2.89128
94	1.83481	3.33311	TRUE	FALSE	2.09311	1.8166
95	2.98003	7.56989	TRUE	FALSE	2.55304	2.54021
96	4.37677	6.7812	TRUE	FALSE	1.60235	1.54936
97	5.30114	6.33775	FALSE	FALSE	1.27174	1.19554
98	1.79849	3.89441	TRUE	FALSE	2.51249	2.16537
99	3.66972	5.13761	TRUE	FALSE	1.40396	1.4
100	1.31488	1.81329	TRUE	FALSE	1.76283	1.37905
101	1.4663	1.72813	TRUE	FALSE	1.32067	1.17857
102	1.03673	3.76894	TRUE	FALSE	3.86127	3.63541
103	3.21101	4.73788	TRUE	FALSE	0.91713	1.47551
104	1.04313	1.73956	TRUE	FALSE	1.8347	1.66764
105	0.902858	1.21755	TRUE	FALSE	1.42607	1.34855
106	1.07527	0.949309	TRUE	FALSE	1.04899	0.882857
107	0.265747	0.200131	TRUE	FALSE	1.11297	0.753086
108	0.200607	0.330731	TRUE	FALSE	1.68358	1.64865
109	0.220568	0.526438	TRUE	FALSE	2.44007	2.38674
110	0.160982	0.568287	TRUE	FALSE	2.25926	3.53012
111	4.99426	10.5197	TRUE	FALSE	2.12539	2.10636
112	4.72386	6.655	TRUE	FALSE	1.33722	1.40881
113	2.6331	3.0714	TRUE	FALSE	1.05577	1.16646
114	1.81022	2.58955	TRUE	FALSE	1.25131	1.43052
115	6.27296	6.31573	TRUE	FALSE	0.903284	1.00682
116	5.82712	6.57297	FALSE	TRUE	1.13897	1.128
117	3.6625	4.81458	FALSE	TRUE	1.26592	1.31456
118	3.28118	6.70481	TRUE	FALSE	1.71869	2.04342
119	0.880203	2.4018	TRUE	FALSE	2.69242	2.72869
120	5.36406	20.0369	TRUE	FALSE	1.23622	3.7354
121	0.129101	0.26181	TRUE	FALSE	2.71186	2.02795
122	0.135948	0.254067	TRUE	FALSE	3.09765	1.86885
123	0.422224	0.841324	TRUE	FALSE	2.90596	1.9926
124	0.586973	0.983396	TRUE	FALSE	1.8286	1.67537
125	1.64762	5.07676	TRUE	FALSE	1.48045	3.08128
126	0.604968	1.18986	TRUE	FALSE	2.15965	1.96681
127	1.64436	1.9658	FALSE	TRUE	1.03865	1.19548
128	3.1306	5.03589	FALSE	TRUE	1.47556	1.6086
129	1.957	2.09083	FALSE	TRUE	1.05181	1.06838
130	2.34038	2.47571	FALSE	TRUE	1.06517	1.05783
131	2.74571	3.80516	FALSE	TRUE	1.27414	1.38586
132	0.11174	0.198601	FALSE	TRUE	2.05818	1.77734
133	2.17348	3.59073	FALSE	TRUE	1.82421	1.65206
134	1.24934	2.87733	FALSE	TRUE	2.35885	2.30307
135	0.625506	1.21348	FALSE	TRUE	2.48315	1.94
136	0.543536	0.987606	FALSE	TRUE	2.22909	1.817
137	2.99308	3.62512	FALSE	FALSE	1.40175	1.21117
138	2.46267	3.38654	FALSE	TRUE	1.28035	1.37515
139	3.77442	5.04173	FALSE	TRUE	1.37564	1.33576
140	10.7362	15.2107	FALSE	TRUE	1.38743	1.41676
141	5.168	4.96836	FALSE	TRUE	0.67767	0.96137
142	0.953778	0.996735	FALSE	TRUE	1.10143	1.04504
143	4.15218	4.83362	FALSE	TRUE	1.01576	1.16412
144	4.50547	3.66723	FALSE	TRUE	0.790862	0.81395
145	5.98817	6.87806	FALSE	TRUE	1.0577	1.14861
146	5.88079	5.78041	FALSE	TRUE	0.938688	0.982932
147	1.73734	1.76314	TRUE	FALSE	0.723526	1.01485
148	4.2569	5.2723	TRUE	FALSE	1.36435	1.23853
149	1.18316	1.23761	TRUE	FALSE	1.06753	1.04602
150	3.58134	5.50416	TRUE	FALSE	1.57515	1.5369
151	1.38124	2.62074	TRUE	FALSE	1.84653	1.89739
152	4.62235	4.87906	TRUE	FALSE	1.05907	1.05554
153	0.148242	0.547337	TRUE	FALSE	3.4902	3.69218
154	3.22882	3.76951	TRUE	FALSE	1.17722	1.16745
155	4.79788	5.10731	TRUE	FALSE	1.07044	1.06449
156	4.2352	3.984	TRUE	FALSE	0.864479	0.940689
157	4.15256	4.31969	FALSE	FALSE	1.01561	1.04025
158	10.0039	10.2113	FALSE	FALSE	1.05259	1.02073
159	6.09145	5.92799	FALSE	FALSE	0.895778	0.973166
160	13.7274	14.735	FALSE	TRUE	1.07317	1.07341
161	8.88512	9.73284	FALSE	TRUE	1.05099	1.09541
162	6.18234	7.03459	FALSE	TRUE	1.07013	1.13785
163	2.69038	2.39875	FALSE	TRUE	0.855795	0.891603
164	1.81975	2.57407	FALSE	TRUE	1.45429	1.41452
165	3.25166	6.49792	TRUE	FALSE	2.17987	1.99834
166	18.6734	14.9118	TRUE	FALSE	0.815745	0.798555
167	8.27602	7.36876	TRUE	FALSE	0.834681	0.890375
168	6.29816	6.05175	TRUE	FALSE	1.15939	0.960876
169	12.1317	12.7204	FALSE	FALSE	1.1917	1.04853
170	9.77119	11.6401	FALSE	TRUE	1.22728	1.19127
171	5.17857	7.7987	FALSE	TRUE	1.04676	1.50596
172	0.930036	1.80475	FALSE	TRUE	1.4794	1.94052
173	6.68194	6.55174	TRUE	FALSE	0.918848	0.980514
174	0.120981	0.0866246	TRUE	FALSE	1.43446	0.716019
175	1.66263	3.01212	TRUE	FALSE	1.54522	1.81167
176	0.87511	1.16223	TRUE	FALSE	1.64121	1.3281
177	0.37618	0.854735	TRUE	FALSE	1.58034	2.27214
178	1.03837	1.83597	TRUE	FALSE	1.92082	1.76813
179	0.705607	0.716892	TRUE	FALSE	1.4237	1.01599
180	0.627532	1.51456	TRUE	FALSE	2.32575	2.41352
181	7.72616	7.0413	FALSE	TRUE	0.89144	0.911358
182	8.57502	9.38399	FALSE	TRUE	0.998539	1.09434
183	3.88388	6.92928	FALSE	TRUE	1.07861	1.78411
184	0.765765	0.821886	TRUE	FALSE	1.23039	1.07329
185	1.33505	1.9479	TRUE	FALSE	1.60348	1.45905
186	0.797563	1.34732	TRUE	FALSE	1.90771	1.68929
187	0.784579	1.23618	TRUE	FALSE	1.12093	1.5756
188	1.5982	2.44373	TRUE	FALSE	1.39364	1.52906
189	0.892197	1.51898	TRUE	FALSE	1.1482	1.70252
190	0.616659	0.717895	TRUE	FALSE	1.0849	1.16417
191	0.629143	0.942418	TRUE	FALSE	1.07602	1.49794
192	2.09416	2.53684	TRUE	FALSE	1.12012	1.21139
193	1.83941	2.1187	FALSE	TRUE	1.68045	1.15184
194	1.55973	1.46402	FALSE	TRUE	0.720856	0.938636
195	10.585	8.07161	FALSE	TRUE	0.516337	0.762554
196	3.97781	4.32362	TRUE	FALSE	1.23929	1.08694
197	14.6151	22.4784	TRUE	FALSE	1.50658	1.53803
198	12.8369	32.126	TRUE	FALSE	2.67663	2.50263
199	27.0276	24.084	FALSE	TRUE	0.816934	0.891089
200	10.8093	11.4172	TRUE	FALSE	1.15753	1.05624
201	0.809118	1.67914	TRUE	FALSE	4.09524	2.07527
202	2.61876	6.04228	TRUE	FALSE	2.19474	2.30731
203	1.24457	1.19558	TRUE	FALSE	0.910938	0.96064
204	1.51818	4.28484	FALSE	TRUE	3.87147	2.82235
205	0.191264	0.308537	FALSE	TRUE	1.76496	1.61315
206	0.43521	0.820998	TRUE	FALSE	2.09704	1.88644
207	0.510622	0.782018	TRUE	FALSE	1.51835	1.5315
208	0.0839649	0.147912	TRUE	FALSE	3.60616	1.76159
209	4.38083	5.47604	TRUE	FALSE	1.22988	1.25
210	0.099528	0.0683738	TRUE	FALSE	0.739726	0.686981
211	1.11899	1.57212	TRUE	FALSE	1.51836	1.40494
212	0.481984	0.85602	TRUE	FALSE	2.32378	1.77604
213	1.13706	1.70486	TRUE	FALSE	2.72775	1.49936
214	1.63017	13.0317	TRUE	FALSE	3.16052	7.99408
215	0.133439	0.100631	TRUE	FALSE	0.839465	0.754132
216	5.62677	10.1736	TRUE	FALSE	0.958649	1.80806
217	1.94013	2.82012	FALSE	TRUE	1.57209	1.45357
218	21.3387	25.1917	FALSE	TRUE	1.13314	1.18057
219	2.2234	4.32623	FALSE	TRUE	2.06442	1.94577
220	2.77289	3.72815	FALSE	FALSE	1.52006	1.3445
221	2.78247	4.07925	FALSE	FALSE	1.32049	1.46605
222	8.45807	14.8525	TRUE	FALSE	1.71554	1.75601
223	0.731176	1.97018	TRUE	FALSE	2.46338	2.69453
224	31.2415	32.2038	TRUE	FALSE	1.04115	1.0308
225	8.17669	11.4662	TRUE	FALSE	1.02612	1.4023
226	0.591332	2.18144	TRUE	FALSE	2.24427	3.68902
227	4.17091	7.56431	TRUE	FALSE	2.11236	1.81359
228	2.99529	4.38902	TRUE	FALSE	1.53056	1.46531
229	1.2712	1.96399	TRUE	FALSE	1.56769	1.545
230	1.92429	3.59584	TRUE	FALSE	1.78782	1.86866
231	5.79433	10.6151	TRUE	FALSE	1.96195	1.83199
232	2.4954	6.36769	TRUE	FALSE	2.27158	2.55177
233	16.7889	24.5186	TRUE	FALSE	1.59268	1.4604
234	19.9207	30.4013	TRUE	FALSE	1.47619	1.52612
235	6.35643	6.04305	TRUE	FALSE	0.91062	0.950698
236	4.49662	5.83565	TRUE	FALSE	1.37597	1.29779
237	0.909582	1.23212	TRUE	FALSE	2.07039	1.3546
238	0.779741	1.24109	TRUE	FALSE	2.11032	1.59167
239	0.359641	0.350469	TRUE	FALSE	1.69175	0.974497
240	2.51871	3.39152	FALSE	FALSE	1.38113	1.34653
241	0.558686	0.880341	FALSE	FALSE	2.33108	1.57573
242	3.74652	5.18106	FALSE	FALSE	1.41274	1.3829
243	0.484541	1.23637	FALSE	FALSE	2.14118	2.55164
244	0.625958	0.96103	TRUE	FALSE	2.26911	1.53529
245	0.899262	1.79593	TRUE	FALSE	2.99922	1.99712
246	0.198072	0.692809	TRUE	FALSE	3.44233	3.49776
247	1.03975	1.45703	TRUE	FALSE	1.76757	1.40133
248	4.02588	5.3605	TRUE	FALSE	1.56419	1.33151
249	4.32143	5.84152	TRUE	FALSE	0.998105	1.35176
250	2.2029	2.35229	TRUE	FALSE	1.06613	1.06782
251	0.952038	1.63549	TRUE	FALSE	1.60147	1.71789
252	7.45312	14.2812	TRUE	FALSE	1.49872	1.91614
253	2.05408	1.99979	TRUE	FALSE	1.32171	0.973571
254	4.08496	4.32993	TRUE	FALSE	1.42722	1.05997
255	1.8077	3.88808	TRUE	FALSE	2.71564	2.15085
256	5.36283	9.45613	TRUE	FALSE	2.02349	1.76327
257	4.60275	5.84014	TRUE	FALSE	1.25238	1.26884
258	0.702978	0.915166	TRUE	FALSE	1.32881	1.30184
259	1.13293	1.28244	TRUE	FALSE	1.15125	1.13197
260	7.625	18.5067	TRUE	FALSE	2.12564	2.42711
261	2.18282	2.23551	FALSE	TRUE	1.01511	1.02414
262	0.640511	0.9111	FALSE	TRUE	1.35695	1.42246
263	1.76385	2.44061	FALSE	TRUE	1.41484	1.38368
264	0.908445	1.47864	FALSE	TRUE	1.79945	1.62766
265	4.34462	5.05984	TRUE	FALSE	0.992859	1.16462
266	0.0814632	0.23892	TRUE	FALSE	3.92308	2.93286
267	0.312182	0.474635	TRUE	FALSE	1.99768	1.52038
268	1.98931	2.74835	TRUE	FALSE	1.49324	1.38156
269	4.13419	6.10383	TRUE	FALSE	1.34321	1.47643
270	4.92063	6.55067	TRUE	FALSE	1.34144	1.33127
271	10.9189	27.1205	TRUE	FALSE	3.70876	2.48382
272	6.76457	24.2609	TRUE	FALSE	4.27399	3.58647
273	2.42099	4.28294	TRUE	FALSE	1.4837	1.76908
274	4.7778	7.03796	TRUE	FALSE	1.99209	1.47305
275	24.0067	39.1979	TRUE	FALSE	1.75745	1.63279
276	2.38447	5.70585	TRUE	FALSE	2.48452	2.39292
277	1.14773	3.25542	TRUE	FALSE	2.94009	2.83638
278	0.232623	0.552533	TRUE	FALSE	3.29869	2.37523
279	0.179046	0.884581	TRUE	FALSE	5.89385	4.94051
280	0.0794065	0.271794	TRUE	FALSE	6.2545	3.42282
281	1.07143	1.72098	TRUE	FALSE	2.57223	1.60625
282	0.310176	0.637956	TRUE	FALSE	2.64242	2.05675
283	6.41314	9.02554	FALSE	FALSE	1.55926	1.40735
284	21.253	22.2944	TRUE	FALSE	1.01712	1.049
285	9.39075	18.5435	TRUE	FALSE	1.72191	1.97465
286	10.7175	8.47856	TRUE	FALSE	0.647368	0.791097
287	2.41618	1.42233	TRUE	FALSE	0.45956	0.588668
288	0.364566	0.475271	TRUE	FALSE	1.76807	1.30366
289	11.2121	8.13853	FALSE	TRUE	0.725869	0.725869
290	33.2237	39.8026	FALSE	TRUE	1.13312	1.19802
291	25.8679	18.6329	FALSE	TRUE	0.710556	0.720309
292	10.7143	13.2519	TRUE	FALSE	1.2163	1.23684
293	1.89498	4.34012	TRUE	FALSE	2.23401	2.29032
294	2.55831	3.20533	TRUE	FALSE	1.32276	1.25291
295	7.5279	12.4263	FALSE	FALSE	1.63302	1.6507
296	6.97648	11.8617	FALSE	FALSE	1.67755	1.70025
297	2.38609	2.49792	FALSE	FALSE	1.04804	1.04687
298	2.33205	4.78024	FALSE	FALSE	2.12796	2.0498
299	4.0288	5.57501	FALSE	FALSE	1.57925	1.38379
300	44.3139	37.0771	FALSE	TRUE	0.820534	0.836691
301	19.5699	20	FALSE	TRUE	1.02041	1.02198
302	28.9084	31.1321	FALSE	TRUE	1.29339	1.07692
303	16.675	25.0166	FALSE	TRUE	1.67862	1.50024
304	23.4492	25.5639	FALSE	TRUE	1.06894	1.09018
305	22.5799	9.63346	FALSE	TRUE	0.585756	0.426639
306	58.4639	66.5438	FALSE	TRUE	1.16041	1.1382
307	1.70402	2.5454	FALSE	TRUE	1.36327	1.49376
308	6.21256	10.6285	FALSE	TRUE	1.71937	1.71081
309	2.48548	3.49412	FALSE	TRUE	0.982911	1.40581
310	10.9956	16.0168	FALSE	TRUE	1.15422	1.45665
311	3.90204	3.91837	FALSE	TRUE	1.27845	1.00418
312	1.40625	1.10714	FALSE	TRUE	1.53036	0.787302
313	6.57618	7.02082	FALSE	TRUE	1.01987	1.06761
314	2.30634	2.53213	FALSE	TRUE	0.879904	1.0979
315	3.875	4.43304	FALSE	TRUE	1.51195	1.14401
316	8.98085	9.30347	FALSE	TRUE	0.855768	1.03592
317	8.65309	9.01431	FALSE	TRUE	0.673473	1.04175
318	1.68265	1.83544	FALSE	TRUE	0.705186	1.09081
319	0.403614	0.606993	FALSE	TRUE	1.36318	1.50389
320	0.534511	0.58878	FALSE	TRUE	1.18017	1.10153
321	0.182429	0.254036	FALSE	TRUE	2.49806	1.39252
322	0.150912	0.445116	FALSE	TRUE	3.12809	2.94951
323	0.377094	0.621861	FALSE	TRUE	1.46457	1.64909
324	2.12674	3.04462	FALSE	TRUE	1.57035	1.43159
325	2.93833	3.02482	FALSE	TRUE	1.03258	1.02943
326	1.01702	1.14242	FALSE	TRUE	1.09588	1.1233
327	36.4699	28.6593	FALSE	FALSE	0.788835	0.785835
328	13.726	21.0954	FALSE	FALSE	1.45431	1.53689
329	30.9211	25.9868	FALSE	TRUE	0.774212	0.840426
330	4.86072	4.31954	FALSE	TRUE	1.11238	0.888661
331	4.38347	6.27209	FALSE	TRUE	1.47321	1.43085
